# Supplementary material for: Long noncoding RNA DIO3OS induces glycolytic-dominant metabolic reprogramming to promote aromatase inhibitor resistance in breast cancer
Source: PubMed Central journal article supplement (PMC9684133; doi:10.1038/s41467-022-34702-x), 2022-11-22
Supplement: 41467_2022_34702_MOESM1_ESM.pdf [file 41467_2022_34702_MOESM1_ESM.pdf]

**Long noncoding RNA DIO3OS Induces Glycolytic-dominant Metabolic  
Reprogramming to Promote Aromatase Inhibitor Resistance in Breast Cancer**

Xueman Chen<sup>#</sup>, Rong Luo<sup>#</sup>, Yunmei Zhang<sup>#</sup>, Shuying Ye, Xin Zeng, Jiang Liu, Di

Huang, Yujie Liu, Qiang Liu, Man-Li Luo<sup>\*</sup>, Erwei Song<sup>\*</sup>

<sup>#</sup> These authors contributed equally to this work.

<sup>\*</sup> Correspondence to Man-Li Luo (luomli@mail.sysu.edu.cn) and Erwei Song  
(songew@mail.sysu.edu.cn)

**Supplementary information**

Contents

Supplementary Figure 1-6

Supplementary Table 1-6

Uncropped Blots and Gels

Supplementary Note 1

# Supplementary Fig. 1

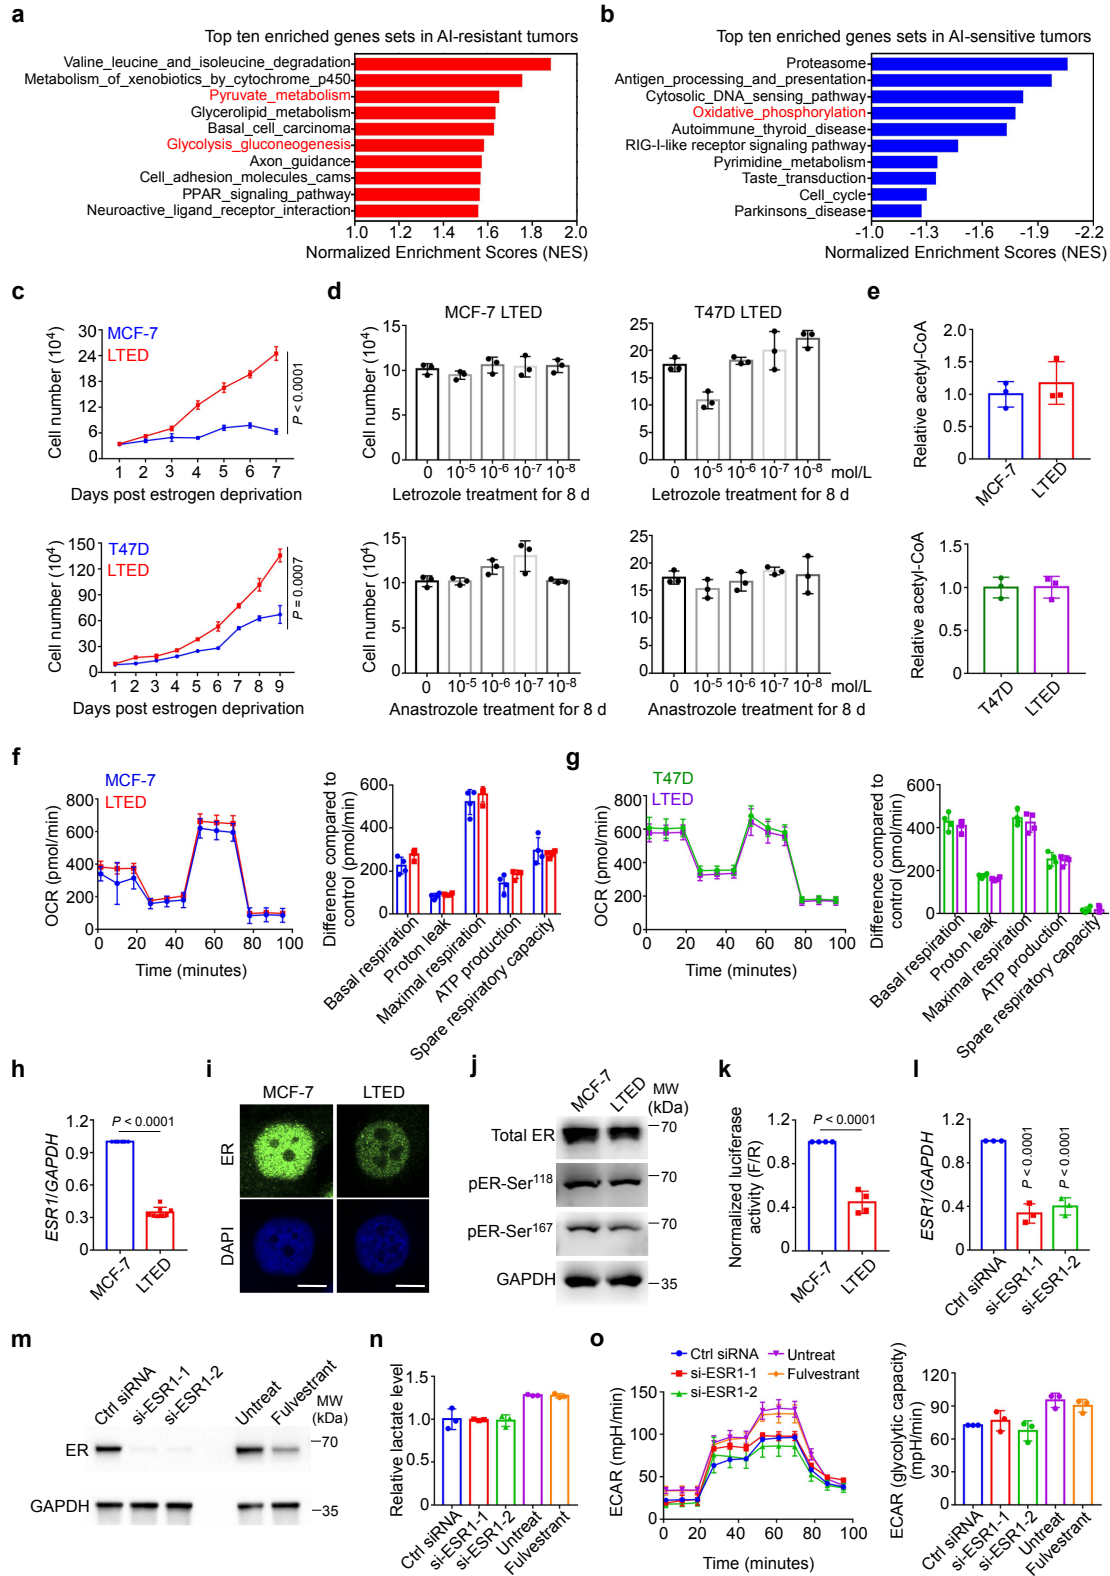

**Supplementary Fig. 1 | AI-resistant ER-positive breast cancer exhibits enhanced aerobic glycolysis.**

**a,b**, The top ten positively enriched (**a**) and top ten negatively enriched (**b**) gene sets in AI-resistant samples (relative to the AI-sensitive group) are displayed with their corresponding normalized enrichment scores (NES). **c**, Growth curves of MCF-7/T47D LTED cells compared with parental MCF-7/T47D cells. **d**, Cell number counting of MCF-7/T47D LTED cells treated with letrozole or anastrozole for 8 days. **e**, The acetyl-CoA production of MCF-7/T47D LTED cells in comparison with parental MCF-7/T47D cells that had undergone one-week estrogen deprivation. **f,g**, OCR values of MCF-7/T47D LTED cells compared with their parental cells that had undergone one-week estrogen deprivation. **h**, qRT-PCR of the ESR1 mRNA level in parental and LTED MCF-7 cells. **i**, Representative immunofluorescence images of ER expression in MCF-7 LTED cells in comparison with MCF-7 cells. Scale bars, 10  $\mu$ m. **j**, Immunoblot of the expression of total ER and phosphorylated ER in MCF-7 LTED cells in comparison with MCF-7 cells. **k**, Luciferase reporter assay of the basal transcriptional level of ER in MCF-7 LTED cells compared with MCF-7 cells. **l**, qRT-PCR of ESR1 knockdown efficiency in MCF-7 LTED cells by indicated siRNAs. **m**, Immunoblot of ER knockdown efficiency in MCF-7 LTED cells by indicated siRNAs and fulvestrant treatment. **n**, Lactate production of MCF-7 LTED cells with ER knockdown by indicated siRNAs or fulvestrant treatment. **o**, ECAR values and calculated glycolytic capacity of MCF-7 LTED with ER knockdown by indicated siRNAs or fulvestrant treatment. Means  $\pm$  s.d. of  $n = 3$  (**c-e,l,n,o**),  $n = 4$  (**f,g,k**) or  $n = 8$  (**h**) independent experiments yielding similar results, one representative experiment out of three that were similar (**i,j,m**) are shown, and  $P$  values were analyzed using two-tailed Student's  $t$ -test (**c,e-h,k**), two-sided one-way ANOVA with Dunnett's multiple-comparisons test (**d,l**). MW, molecular weight. Source data are provided as a Source Data file.





**Supplementary Fig. 2 | AI-resistant ER-positive breast cancer exhibits upregulated DIO3OS expression.**

**a**, qRT-PCR of candidate lncRNAs in tumor samples from ER-positive breast cancer patients that were sensitive or resistant to AI treatment. **b**, Northern blot of DIO3OS expression in MCF-7/T47D LTED cells compared with their parental cells. ACTB serves as loading control RNA. nt, nucleotide. **c,d**, 3'-/5'-RACE of DIO3OS (**c**) and sanger sequencing of the corresponding bands (**d**). **e**, Full-length DIO3OS was cloned into a eukaryotic expression vector pcDNA3.1 with an N-terminal codon ATG in three expression patterns. GFP serves as a positive control. **f**, qRT-PCR for DIO3OS expression in nuclear and cytoplasmic fractionations of parental and LTED MCF-7 cells. MALAT1 serves as a positive control for nuclear gene expression, while GAPDH RNA serves as the positive control for cytoplasmic gene expression. **g**, Representative FISH images of the nuclear localization of DIO3OS in MCF-7/T47D LTED cells. Scale bars, 10  $\mu$ m. Means  $\pm$  s.d. of  $n = 13$  biological replicates (**a**) or  $n = 4$  independent experiments (**f**), one representative experiment out of three that were similar (**b,c,e,g**), and all  $P$  values were analyzed using two-tailed Student's  $t$ -test. Source data are provided as a Source Data file.

### Supplementary Fig. 3

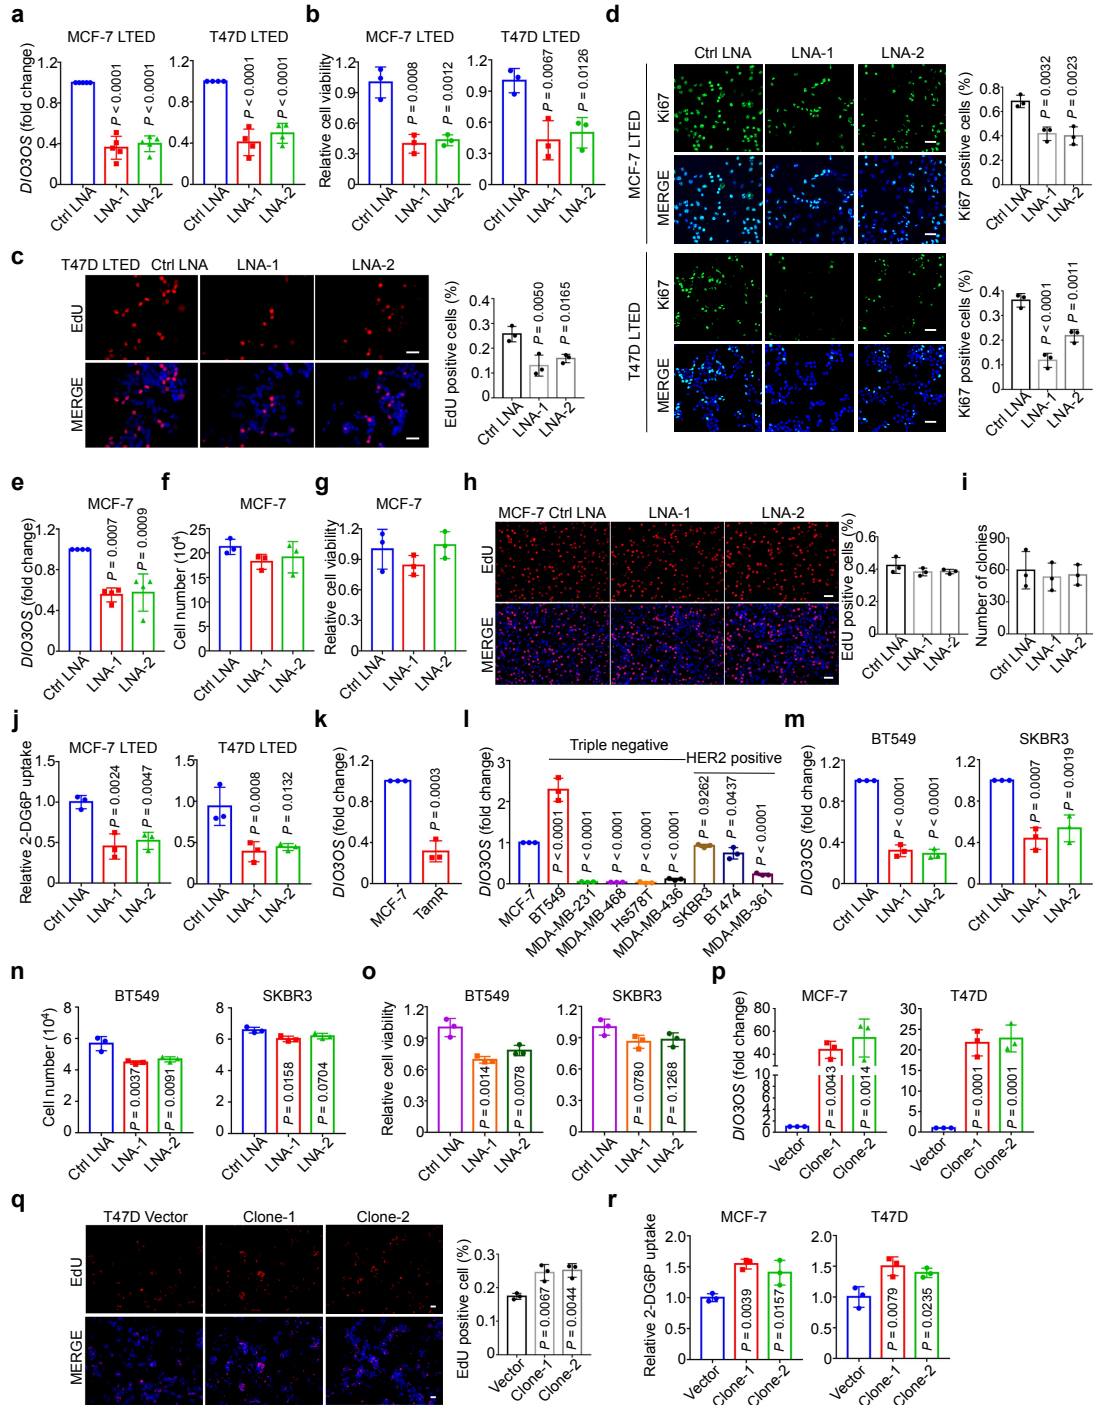

**Supplementary Fig. 3 | DIO3OS regulates the proliferation and aerobic glycolysis of LTED cells.**

**a**, qRT-PCR of DIO3OS knockdown efficiency in MCF-7/T47D LTED cells by indicated LNAs. Means  $\pm$  s.d. of  $n = 5$  (MCF-7 LTED cells) or  $n = 4$  (T47D LTED cells) independent experiments are shown. **b**, MTT assay of MCF-7/T47D LTED transfected with indicated LNAs. **c**, Representative immunofluorescence images and quantification of EdU-incorporated T47D LTED cells with and without DIO3OS knockdown. Scale bars, 50  $\mu$ m. **d**, Representative immunofluorescence images and quantification of Ki67-stained MCF-7/T47D LTED cells transfected with indicated LNAs. Scale bars, 50  $\mu$ m. **e**, qRT-PCR of DIO3OS knockdown efficiency in parental MCF-7 cells by indicated LNAs. **f,g**, Cell number counting (**f**) and MTT assay (**g**) of parental MCF-7 cells transfected with indicated LNAs. **h**, Representative immunofluorescence images and quantification of EdU-incorporated parental MCF-7 cells with and without DIO3OS knockdown. Scale bars, 50  $\mu$ m. **i**, Quantification of plate clone formation of parental MCF-7 cells transfected with indicated LNAs. **j**, Glucose uptake of MCF-7/T47D LTED cells transfected with indicated LNAs. **k**, qRT-PCR of DIO3OS expression in tamoxifen-resistant MCF-7 cells and their parental cells. **l**, qRT-PCR of DIO3OS expression in MCF-7 cells, triple negative and HER2-positive breast cancer cell lines. **m**, qRT-PCR of DIO3OS knockdown efficiency in BT549/SKBR3 cells by indicated LNAs. **n,o**, Cell counting (**n**) and MTT assay (**o**) of BT549/SKBR3 cells with and without DIO3OS knockdown. **p**, qRT-PCR of DIO3OS overexpression efficiency in parental MCF-7/T47D cells. **q**, Representative immunofluorescence images and quantification of EdU-incorporated parental T47D cells with and without DIO3OS overexpression. Scale bars, 50  $\mu$ m. **r**, Glucose uptake of parental MCF-7/T47D cells with and without DIO3OS overexpression. Means  $\pm$  s.d. of  $n = 3$  (**b-d,f-r**) or  $n = 4$  (**e**) independent experiments yielding similar results are presented, and all *P* values were calculated by two-sided one-way ANOVA with Dunnett's multiple-comparisons test. Source data are provided as a Source Data file.



**Supplementary Fig. 4 | DIO3OS interacts with PTBP1 in the nucleus.**

**a**, CLIP assay with the anti-PTBP1 antibody demonstrating the direct interaction of DIO3OS and PTBP1 in MCF-7 LTED cells. **b-g**, Predicted secondary structures of six DIO3OS variants by RNAfold. The red box (**g**) denotes the secondary structure of ENST00000554735 differing from other five variants. **h**, Predicted PTBP1-binding motifs in the stem-loop structures surrounded by the red box in **g**. **i,j**, qRT-PCR (**i**) and immunoblot (**j**) of PTBP1 knockdown efficiency in MCF-7/T47D LTED cells. MW, molecular weight. **k,l**, qRT-PCR (**k**) and Northern blot (**l**) of DIO3OS expression in MCF-7 LTED cells with and without PTBP1 knockdown. ACTB serves as loading control RNA. nt, nucleotide. **m**, Representative immunofluorescence images and quantification of EdU-incorporated MCF-7 LTED cells transfected with control or PTBP1 siRNAs. Scale bars, 50  $\mu\text{m}$ . Means  $\pm$  s.d. of  $n = 3$  (**a,i,k,m**) independent experiments yielding similar results, one representative experiment out of three that were similar (**j,l**) are shown, and  $P$  values were determined using two-tailed Student's  $t$ -test (**a**), two-sided one-way ANOVA with Dunnett's multiple-comparisons test (**i,k,m**). Source data are provided as a Source Data file.

# Supplementary Fig. 5

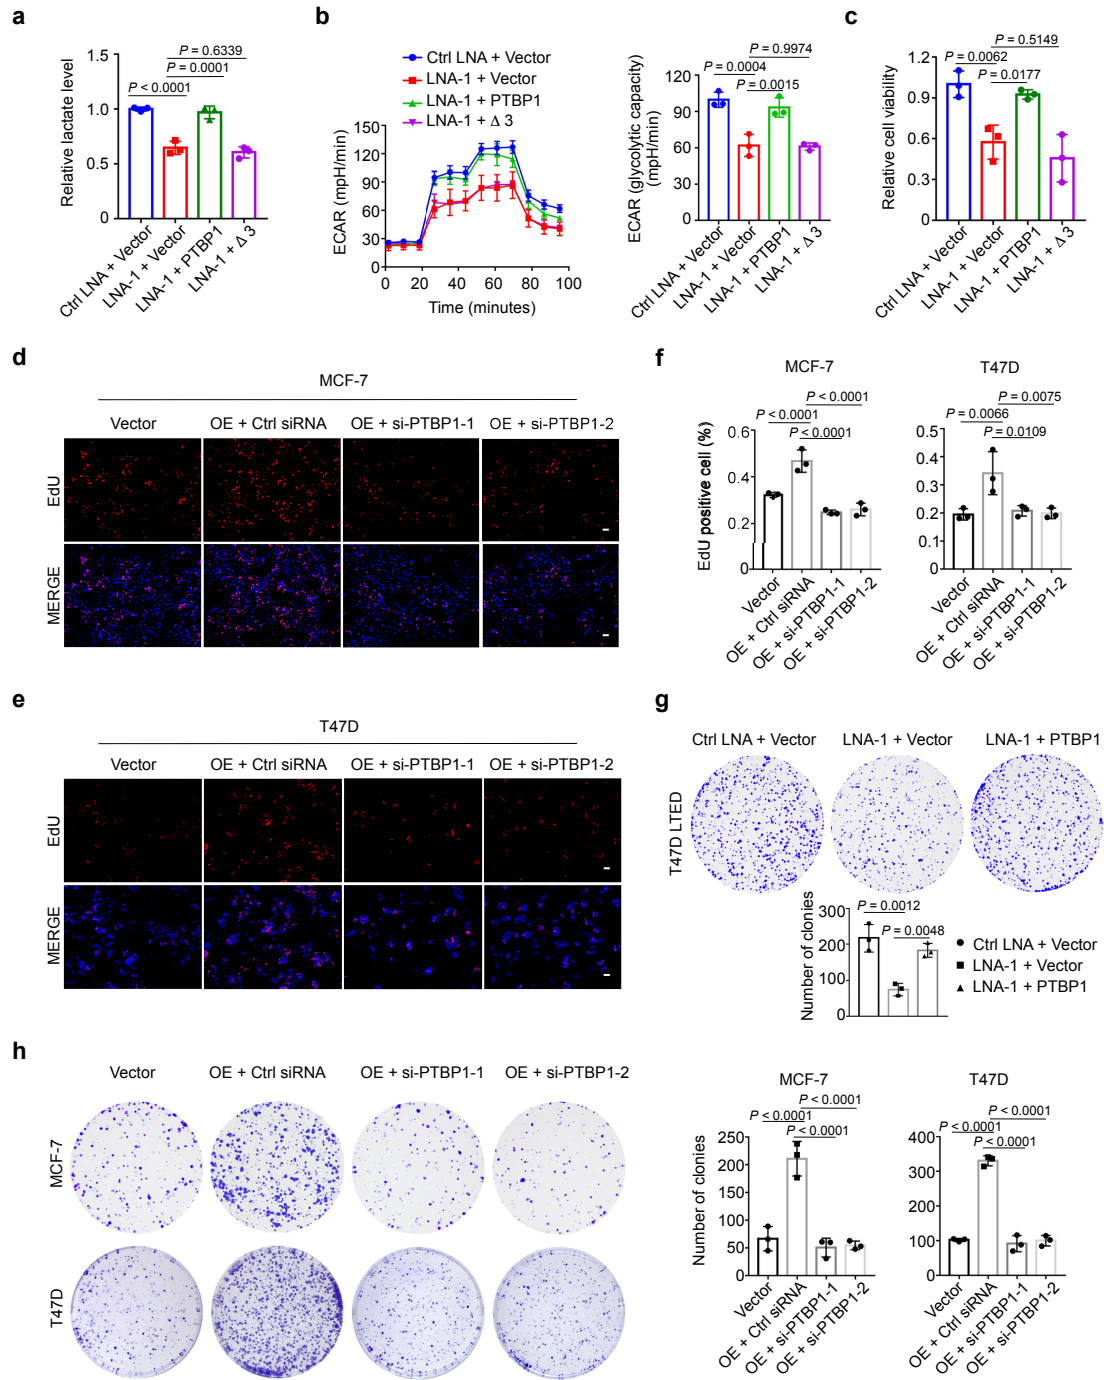

**Supplementary Fig. 5 | DIO3OS regulates LTED cell proliferation and glycolysis through PTBP1.**

**a**, Lactate production of MCF-7 LTED cells co-transfected with indicated LNAs and plasmids. **b**, ECAR values and calculated glycolytic capacity of MCF-7 LTED cells co-transfected with indicated LNAs and plasmids. **c**, MTT assay MCF-7 LTED cells co-transfected with indicated LNAs and plasmids. **d,e**, Representative immunofluorescence images of EdU-incorporated parental MCF-7/T47D cells transfected with control construct or co-transfected with DIO3OS expression plasmid and control or PTBP1 siRNAs. Scale bars, 50  $\mu\text{m}$ . **f**, Quantification of EdU-incorporated parental MCF-7/T47D cells in **d** and **e**. **g**, Representative images and quantification of plate clone formation of T47D LTED cells co-transfected with indicated LNAs and plasmids. **h**, Representative images and quantification of plate clone formation of parental MCF-7/T47D cells with indicated plasmids and siRNAs. Means  $\pm$  s.d. of  $n = 3$  (**a-c,f-h**) independent experiments yielding similar results are presented, and all  $P$  values were analyzed using two-sided one-way ANOVA with Dunnett's multiple-comparisons test. Source data are provided as a Source Data file.

# Supplementary Fig. 6

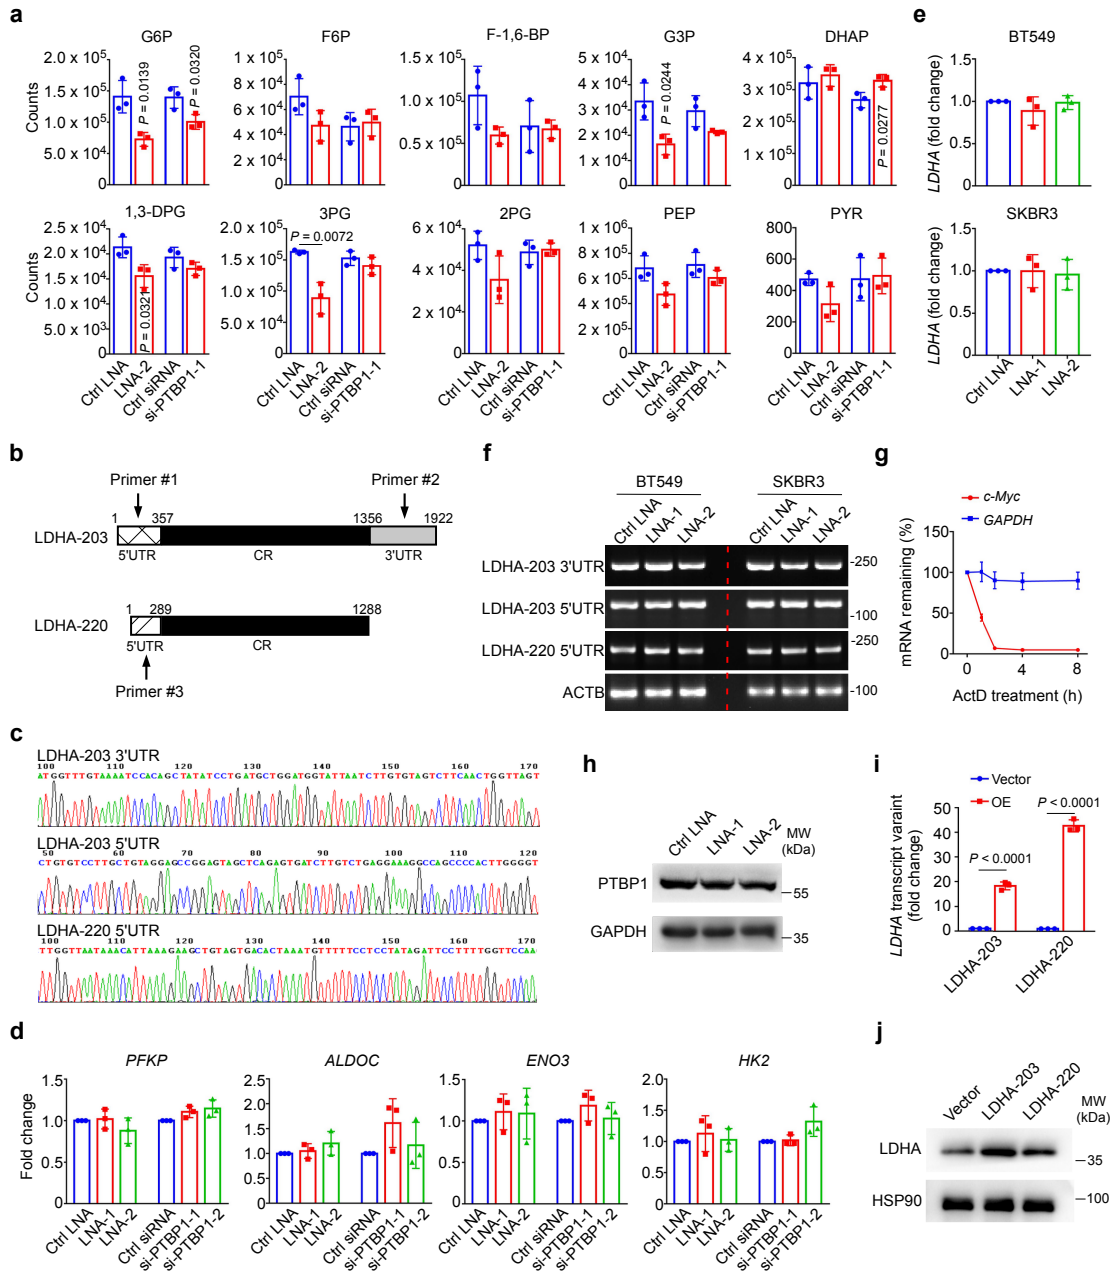



**Supplementary Fig. 6 | DIO3OS and PTBP1 stabilizes LDHA mRNA by regulating its splicing switch.**

**a**, LC-MS analysis of glycolytic intermediate production in MCF-7 LTED cells with and without DIO3OS/PTBP1 knockdown. **b**, Schematic diagram of the primers targeting the 5'/3'UTR of two LDHA variants. Nucleotide positions of the LDHA 5'/3'UTR are indicated. **c**, Sanger sequencing of the PCR products purified by gel extraction in Figure 5f. **d**, qRT-PCR of four glycolysis-related candidate genes in MCF-7 LTED cells with and without DIO3OS/PTBP1 knockdown. **e**, qRT-PCR of LDHA expression in BT549/SKBR3 cells with and without DIO3OS knockdown. **f**, qRT-PCR and agarose gel of the 5'/3'UTR of LDHA mRNA in BT549/SKBR3 cells with and without DIO3OS knockdown. **g**, Half-life of c-Myc and GAPDH mRNAs in MCF-7 LTED cells determined by using 10 µg/mL actinomycin D (ActD) at indicated time points. **h**, Immunoblot of PTBP1 expression in MCF-7 LTED cells with and without DIO3OS knockdown. **i**, qRT-PCR of LDHA-203/LDHA-220 overexpression efficiency in parental MCF-7 cells. **j**, Immunoblot of LDHA overexpression efficiency in parental MCF-7 cells transfected with LDHA-203/LDHA-220 plasmids. Means ± s.d. of n = 3 (**a,d,e,g,i**) independent experiments yielding similar results, one representative experiment out of three that were similar (**f,h,j**) are shown, and *P* values were calculated using two-tailed Student's *t*-test (**a,i**), two-sided one-way ANOVA with Dunnett's multiple-comparisons test (**d,e**). MW, molecular weight. Source data are provided as a Source Data file.

**Supplementary Table 1 | Differential lncRNA expression in the RNA-sequencing as in Fig. 1h.**

| AI-resistant vs AI-sensitive | Differentially expressed lncRNA |                |
|------------------------------|---------------------------------|----------------|
|                              | Up-regulated                    | Down-regulated |
| 1                            | LINC00989                       | AC107208.1     |
| 2                            | SH3RF3-AS1                      | HRAT17         |
| 3                            | AL596442.2                      | AC005699.1     |
| 4                            | MGC12916                        | AL353803.1     |
| 5                            | FRG1-DT                         | LINC01543      |
| 6                            | AP001476.1                      | AL035412.1     |
| 7                            | LINC01770                       | AL160291.1     |
| 8                            | C18orf65                        | AL034347.1     |
| 9                            | LINC02256                       | AC124276.2     |
| 10                           | LINC00310                       | AL591468.1     |
| 11                           | LINC01140                       | AC027013.1     |
| 12                           | LINC00840                       | AC011816.2     |
| 13                           | DIO3OS                          | AC005899.7     |
| 14                           | AC025035.1                      | AC055811.3     |
| 15                           | AP000442.1                      | MMP2-AS1       |
| 16                           | AL118556.1                      | LINC00943      |
| 17                           | AC068790.9                      | AC092681.2     |
| 18                           | DPH6-DT                         | AC125494.2     |
| 19                           | LINC00908                       | ERVH48-1       |
| 20                           | LINC01474                       | AC017002.3     |
| 21                           | AC005180.1                      | AC112721.2     |
| 22                           | AL050327.1                      | AC092803.2     |
| 23                           | LINC01356                       | AC104785.1     |
| 24                           | LINC01264                       | AC126773.4     |
| 25                           | AC004947.1                      | LINC01943      |
| 26                           | AC024257.5                      | AP002360.2     |
| 27                           | LINC01230                       | AL031123.1     |
| 28                           | AC002546.1                      |                |
| 29                           | PGM5P3-AS1                      |                |
| 30                           | AC016924.1                      |                |
| 31                           | AC013448.1                      |                |
| 32                           | AL365181.4                      |                |
| 33                           | LINC02544                       |                |

**Supplementary Table 2 | Correlation of DIO3OS expression with the clinicopathological status in 257 cases of AI-treated ER-positive breast cancer patients.**

|                                 | No. of patients | DIO3OS <sup>#</sup> |            | P value |
|---------------------------------|-----------------|---------------------|------------|---------|
|                                 |                 | < 3                 | ≥ 3        |         |
| <b>Tumor Size (cm)</b>          |                 |                     |            |         |
| ≤2                              | 121             | 78 (64.5%)          | 43 (35.5%) | 0.014*  |
| > 2                             | 136             | 67 (49.3%)          | 69 (50.7%) |         |
| <b>Histological Grade</b>       |                 |                     |            |         |
| I                               | 24              | 16 (66.7%)          | 8 (33.3%)  | 0.329   |
| II                              | 132             | 77 (58.3%)          | 55 (41.7%) |         |
| III                             | 101             | 52 (51.5%)          | 49 (48.5%) |         |
| <b>Lymph Node Metastasis</b>    |                 |                     |            |         |
| 0                               | 109             | 61 (56.0%)          | 48 (44.0%) | 0.238   |
| 1~3                             | 66              | 43 (65.2%)          | 23 (34.8%) |         |
| 4~9                             | 38              | 21 (55.3%)          | 17 (44.7%) |         |
| ≥ 10                            | 44              | 20 (45.5%)          | 24 (54.5%) |         |
| <b>Distant organ metastasis</b> |                 |                     |            |         |
| Negative                        | 206             | 120 (58.2%)         | 86 (41.7%) | 0.234   |
| Positive                        | 51              | 25 (49.0%)          | 26 (51.0%) |         |
| <b>Stage</b>                    |                 |                     |            |         |
| Tis                             | 7               | 4 (57.1%)           | 3 (42.9%)  | 0.448   |
| I                               | 60              | 36 (60.0%)          | 24 (40.0%) |         |
| II                              | 83              | 52 (62.7%)          | 31 (37.3%) |         |
| III                             | 56              | 28 (50.0%)          | 28 (50.0%) |         |
| IV                              | 51              | 25 (49.0%)          | 26 (51.0%) |         |
| <b>Ki-67 (% of tumor cells)</b> |                 |                     |            |         |
| ≤14%                            | 65              | 48 (73.8%)          | 17 (26.2%) | 0.001*  |
| > 14%                           | 192             | 97 (50.5%)          | 95 (49.5%) |         |

<sup>#</sup> DIO3OS expression in breast cancer tissue was determined by ISH and cut off by X-tile analysis.

\*  $P < 0.05$ , statistically significant and determined by two-tailed  $\chi^2$  test.

**Supplementary Table 3 | Proteins pulled by DIO3OS in MCF-7 LTED cells.**

|    | <b>Protein description</b>                                | <b>Score</b> | <b>Matches</b> | <b>Sequences</b> | <b>emPAI</b> |
|----|-----------------------------------------------------------|--------------|----------------|------------------|--------------|
| 1  | <b>Polypyrimidine tract-binding protein 1</b>             | 1387         | 80(52)         | 29(21)           | 5.66         |
| 2  | Keratin, type II cytoskeletal 1                           | 855          | 57(37)         | 28(24)           | 2.53         |
| 3  | Keratin, type I cytoskeletal 10                           | 784          | 54(28)         | 26(20)           | 2.48         |
| 4  | Keratin, type II cytoskeletal 2 epidermal                 | 770          | 47(28)         | 26(18)           | 1.93         |
| 5  | 60S ribosomal protein L4                                  | 760          | 71(41)         | 31(21)           | 5.88         |
| 6  | Polypyrimidine tract-binding protein 3                    | 561          | 43(26)         | 18(13)           | 1.62         |
| 7  | 60S ribosomal protein L6                                  | 392          | 35(17)         | 20(12)           | 3.26         |
| 8  | Double-stranded RNA-binding protein Staufin homolog 1     | 350          | 37(20)         | 21(16)           | 1.48         |
| 9  | 60S ribosomal protein L7                                  | 303          | 36(14)         | 19(11)           | 3.05         |
| 10 | 60S ribosomal protein L13                                 | 261          | 25(12)         | 10(8)            | 2.19         |
| 11 | 60S ribosomal protein L7a                                 | 234          | 21(11)         | 15(10)           | 1.84         |
| 12 | Keratin, type II cytoskeletal 5                           | 204          | 21(9)          | 14(7)            | 0.59         |
| 13 | Serum albumin                                             | 173          | 15(7)          | 7(5)             | 0.31         |
| 14 | Keratin, type I cytoskeletal 14                           | 170          | 17(8)          | 10(6)            | 0.64         |
| 15 | Keratin, type I cytoskeletal 9                            | 169          | 18(8)          | 12(7)            | 0.43         |
| 16 | RNA-binding protein 34                                    | 164          | 10(4)          | 8(4)             | 0.30         |
| 17 | Keratin, type I cytoskeletal 18                           | 154          | 3(3)           | 2(2)             | 0.14         |
| 18 | 60S ribosomal protein L3                                  | 149          | 25(9)          | 14(7)            | 0.62         |
| 19 | Tubulin alpha-1C chain                                    | 130          | 9(4)           | 6(3)             | 0.29         |
| 20 | 60S ribosomal protein L8                                  | 119          | 14(8)          | 11(6)            | 0.95         |
| 21 | 60S ribosomal protein L29                                 | 113          | 8(4)           | 5(3)             | 1.01         |
| 22 | Keratin, type II cytoskeletal 8                           | 112          | 12(5)          | 7(3)             | 0.35         |
| 23 | 40S ribosomal protein S2                                  | 76           | 3(3)           | 3(3)             | 0.35         |
| 24 | 60S acidic ribosomal protein P0                           | 75           | 11(5)          | 7(4)             | 0.58         |
| 25 | 40S ribosomal protein S4, X isoform                       | 67           | 10(3)          | 8(3)             | 0.37         |
| 26 | Transthyretin                                             | 65           | 2(2)           | 1(1)             | 0.47         |
| 27 | Putative elongation factor 1-alpha-like 3                 | 64           | 5(1)           | 2(1)             | 0.07         |
| 28 | 60S ribosomal protein L22                                 | 62           | 1(1)           | 1(1)             | 0.23         |
| 29 | Serine beta-lactamase-like protein LACTB, mitochondrial   | 62           | 12(4)          | 8(3)             | 0.30         |
| 30 | 60S ribosomal protein L18                                 | 60           | 3(2)           | 3(2)             | 0.33         |
| 31 | Tubulin beta-2B chain                                     | 56           | 3(1)           | 3(1)             | 0.14         |
| 32 | 60S ribosomal protein L10a                                | 54           | 4(1)           | 4(1)             | 0.13         |
| 33 | 40S ribosomal protein S6                                  | 54           | 11(3)          | 9(2)             | 0.24         |
| 34 | 60S ribosomal protein L21                                 | 45           | 5(2)           | 4(2)             | 0.39         |
| 35 | 40S ribosomal protein S8                                  | 43           | 6(1)           | 5(1)             | 0.14         |
| 36 | Serpin A12                                                | 41           | 10(2)          | 1(1)             | 0.07         |
| 37 | Y-box-binding protein 3                                   | 40           | 14(3)          | 12(3)            | 0.27         |
| 38 | Hornerin                                                  | 36           | 4(2)           | 2(1)             | 0.02         |
| 39 | 2'-5'-oligoadenylate synthase-like protein                | 34           | 1(1)           | 1(1)             | 0.06         |
| 40 | 60S ribosomal protein L10                                 | 34           | 5(1)           | 3(1)             | 0.13         |
| 41 | Heterogeneous nuclear ribonucleoprotein H2                | 33           | 6(2)           | 5(2)             | 0.14         |
| 42 | Transmembrane and coiled-coil domain-containing protein 3 | 31           | 3(3)           | 1(1)             | 0.04         |

**Supplementary Table 4 | MS/MS of human PTBP1 peptide (57221Dal). Related to Fig. 3 and Supplementary Table 3.**

| Query | Observed  | Mr(expt)  | Mr(calc)  | ppm   | Score | Expect   | Rank | Peptide                         |
|-------|-----------|-----------|-----------|-------|-------|----------|------|---------------------------------|
| 26    | 361.7260  | 721.4375  | 721.4374  | 0.14  | 29    | 0.0017   | 1    | K.IITFTK.N                      |
| 149   | 381.7486  | 761.4826  | 761.4799  | 3.56  | 42    | 0.00019  | 1    | K.ILFNKK.E                      |
| 173   | 383.2599  | 764.5052  | 764.5021  | 4.12  | 16    | 0.028    | 2    | R.VHIRK.L                       |
| 221   | 387.7406  | 773.4666  | 773.4647  | 2.45  | 37    | 0.0034   | 1    | K.LTSLNVK.Y                     |
| 453   | 410.7628  | 819.5110  | 819.5079  | 3.83  | 22    | 0.014    | 1    | K.LHGKPIR.I                     |
| 554   | 419.2333  | 836.4521  | 836.4504  | 2.02  | 44    | 0.00032  | 1    | K.KFKGDSR.S                     |
| 1001  | 451.2523  | 900.4900  | 900.4858  | 4.65  | 10    | 2.9      | 1    | K.GFKFFQK.D                     |
| 1209  | 466.2871  | 930.5595  | 930.5572  | 2.52  | 48    | 0.00012  | 1    | K.VTNLLMLK.G                    |
| 1326  | 474.2855  | 946.5564  | 946.5521  | 4.48  | (42)  | 0.00048  | 1    | K.VTNLL->M<-LK.G                |
| 1460  | 484.7698  | 967.5250  | 967.5239  | 1.10  | 12    | 0.65     | 4    | K.FFQKDRK.M                     |
| 1649  | 496.2764  | 990.5382  | 990.5359  | 2.31  | 54    | 5.4e-005 | 1    | K.HQNVQLPR.E                    |
| 2125  | 529.7545  | 1057.4944 | 1057.4941 | 0.26  | (59)  | 1.1e-005 | 1    | K.DYGNSPLHR.F                   |
| 2126  | 353.5064  | 1057.4972 | 1057.4941 | 2.96  | 59    | 1e-005   | 1    | K.DYGNSPLHR.F                   |
| 2501  | 553.8175  | 1105.6204 | 1105.6132 | 6.58  | 68    | 2e-006   | 1    | K.VLFSSNGGVVK.G                 |
| 4276  | 682.8962  | 1363.7779 | 1363.7711 | 5.00  | (54)  | 2.6e-005 | 1    | R.IDFSKLTSLNVK.Y                |
| 4280  | 455.6003  | 1363.7792 | 1363.7711 | 5.93  | 57    | 1.4e-005 | 1    | R.IDFSKLTSLNVK.Y                |
| 4560  | 470.2552  | 1407.7439 | 1407.7358 | 5.80  | 1     | 11       | 1    | K.LTSLNVKYNNDK.S                |
| 4732  | 716.3769  | 1430.7392 | 1430.7306 | 6.00  | 54    | 8.6e-005 | 1    | R.GQPIYIQFSNHK.E                |
| 4734  | 477.9204  | 1430.7393 | 1430.7306 | 6.06  | (44)  | 0.00086  | 1    | R.GQPIYIQFSNHK.E                |
| 5311  | 511.9688  | 1532.8844 | 1532.8787 | 3.74  | 6     | 1.2      | 1    | R.ITLSKHQNVQLPR.E               |
| 6461  | 601.3280  | 1800.9622 | 1800.9522 | 5.51  | 40    | 0.0016   | 1    | R.GQPIYIQFSNHKELK.T             |
| 6465  | 451.2481  | 1800.9633 | 1800.9522 | 6.16  | (27)  | 0.036    | 1    | R.GQPIYIQFSNHKELK.T             |
| 6855  | 949.4514  | 1896.8883 | 1896.8822 | 3.21  | 93    | 5.8e-009 | 1    | K.LSLDGQNIYNACCTLR.I            |
| 6858  | 633.3042  | 1896.8908 | 1896.8822 | 4.52  | (45)  | 0.00037  | 1    | K.LSLDGQNIYNACCTLR.I            |
| 7259  | 992.5577  | 1983.1008 | 1983.0929 | 4.01  | 40    | 0.00075  | 1    | K.LPIDVTEGEVISLGLPFGK.V         |
| 7323  | 500.5193  | 1998.0481 | 1998.0422 | 2.94  | 37    | 0.0029   | 1    | R.IDFSKLTSLNVKYNNDK.S           |
| 7461  | 680.3743  | 2038.1012 | 2038.0888 | 6.07  | 65    | 3.2e-006 | 1    | R.VTPQSLFILFGVYGDVQR.V          |
| 7462  | 1020.0593 | 2038.1041 | 2038.0888 | 7.52  | (44)  | 0.00045  | 1    | R.VTPQSLFILFGVYGDVQR.V          |
| 7581  | 693.0231  | 2076.0474 | 2076.0348 | 6.05  | 15    | 0.47     | 1    | K.HQNVQLPREGQEDQGLTK.D          |
| 7744  | 704.7412  | 2111.2018 | 2111.1878 | 6.63  | 71    | 3.4e-007 | 1    | R.KLPIDVTEGEVISLGLPFGK.V        |
| 7747  | 1056.6130 | 2111.2115 | 2111.1878 | 11.2  | (33)  | 0.0017   | 1    | R.KLPIDVTEGEVISLGLPFGK.V        |
| 7899  | 1072.5084 | 2143.0023 | 2142.9930 | 4.33  | (35)  | 0.0035   | 1    | R.EGQEDQGLTKDYGNSPLHR.F         |
| 7900  | 715.3417  | 2143.0034 | 2142.9930 | 4.84  | 80    | 1.2e-007 | 1    | R.EGQEDQGLTKDYGNSPLHR.F         |
| 7905  | 536.7588  | 2143.0061 | 2142.9930 | 6.09  | (54)  | 5.2e-005 | 1    | R.EGQEDQGLTKDYGNSPLHR.F         |
| 8411  | 561.5347  | 2242.1098 | 2242.1131 | -1.44 | (6)   | 3.9      | 1    | K.NNQFQALLQYADPVSAQHAK.L        |
| 8412  | 1122.0630 | 2242.1114 | 2242.1131 | -0.72 | (26)  | 0.043    | 1    | K.NNQFQALLQYADPVSAQHAK.L        |
| 8414  | 748.3812  | 2242.1219 | 2242.1131 | 3.93  | 68    | 2.5e-006 | 1    | K.NNQFQALLQYADPVSAQHAK.L        |
| 8572  | 759.1026  | 2274.2860 | 2274.2695 | 7.22  | (56)  | 8.8e-006 | 1    | R.IAIPLAGAGNSVLLVSNLNP.V        |
| 8573  | 1138.1511 | 2274.2877 | 2274.2695 | 7.98  | 70    | 3.6e-007 | 1    | R.IAIPLAGAGNSVLLVSNLNP.V        |
| 10311 | 690.3565  | 2757.3967 | 2757.3834 | 4.82  | 9     | 1.8      | 1    | R.GQPIYIQFSNHKELKTDSSPNQAR.A    |
| 10957 | 737.3972  | 2945.5598 | 2945.5399 | 6.74  | 21    | 0.078    | 1    | K.IITFTKNNQFQALLQYADPVSAQHAK.L  |
| 11056 | 998.8534  | 2993.5385 | 2993.5134 | 8.38  | 14    | 0.39     | 1    | K.NFQNIFFPSATLHLSNIPPSVSEEDLK.V |

**Supplementary Table 5 | Primers used in the qRT-PCR and PCR assays for indicated genes, related to methods.**

| Gene name      | Sequence                               |
|----------------|----------------------------------------|
| <b>qRT-PCR</b> |                                        |
| GAPDH          | 5'-ATCACCATCTTCCAGGAGCGA-3'(forward)   |
|                | 5'-CCTTCTCCATGGTGGTGAAGAC-3'(reverse)  |
| ACTB           | 5'-GATGCGTTGTTACAGGAAGTCC-3'(forward)  |
|                | 5'-GGCACGAAGGCTCATCATTCA-3'(reverse)   |
| DIO3OS         | 5'-AGGCCAGCCCAATAGGAA-3'(forward)      |
|                | 5'-GGCCCAAGAAACAGCAACA-3'(reverse)     |
| ESR1           | 5'-GAAAGGTGGGATACGAAAAGACC-3'(forward) |
|                | 5'-GCTGTTCTTCTTAGAGCGTTTGA-3'(reverse) |
| AC004947       | 5'-GGCTCGGCAGAGAACTCAGTGA-3'(forward)  |
|                | 5'-AGGCGGGCAATGAAGGGCTT-3'(reverse)    |
| AC002546       | 5'-GCAGCCTTCCAATCCAGCAGAG-3'(forward)  |
|                | 5'-GGAGAAGTCTGAGGGCAGGAGTC-3'(reverse) |
| LINC01230      | 5'-GGACTGGCTGTGCTGCTACCT-3'(forward)   |
|                | 5'-TCAGTTGCCTCAGTTGCCTCATC-3'(reverse) |
| LDHA           | 5'-TTGACCTACGTGGCTTGGAAG-3'(forward)   |
|                | 5'-GGTAACGGAATCGGGCTGAAT-3'(reverse)   |
| LDHA-203 3'UTR | 5'-AGGTGGAGGTTGTGCATGTTG-3'(forward)   |
|                | 5'-GCAGTACGTACAGCATTGGCA-3'(reverse)   |
| LDHA-203 5'UTR | 5'-TCGGAGGACCCAGCAATTAGTC-3'(forward)  |
|                | 5'-TACTCCGGCTCCTACAGCAAG-3'(reverse)   |
| LDHA-220 5'UTR | 5'-AGTGGCAAATACCCCAAAGGA-3'(forward)   |
|                | 5'-ATTCTGGGGGTCTGTTCTTCC-3'(reverse)   |
| Luciferase     | 5'-GATTGACAAGGATGGATGGC-3'(forward)    |
|                | 5'-CGTCATCGTCGGGAAGACCT-3'(reverse)    |
| MALAT1         | 5'-GTCATAACCAGCCTGGCAGT-3'(forward)    |
|                | 5'-CGAAACATTGGCACACAGCA-3'(reverse)    |
| PTBP1          | 5'-AGCGCGTGAAGATCCTGTTC-3'(forward)    |
|                | 5'-CAGGGGTGAGTTGCCGTAG-3'(reverse)     |
| PFKP           | 5'-CGCCTACCTCAACGTGGTG-3'(forward)     |
|                | 5'-ACCTCCAGAACGAAGGTCCTC-3'(reverse)   |
| ALDOC          | 5'-ATGCCTCACTCGTACCCAG-3'(forward)     |
|                | 5'-TTTCCACCCCAATTTGGCTCA-3'(reverse)   |
| ENO3           | 5'-TATCGCAATGGGAAGTACGATCT-3'(forward) |
|                | 5'-AAGCTCTTATACAGCTCTCCGA-3'(reverse)  |
| HK2            | 5'-TTGACCAGGAGATTGACATGGG-3'(forward)  |
|                | 5'-CAACCGCATCAGGACCTCA-3'(reverse)     |
| c-Myc          | 5'-GTCAAGAGGCGAACACACAAC-3'(forward)   |

|                |                                                |
|----------------|------------------------------------------------|
|                | 5'-TTGGACGGACAGGATGTATGC-3'(reverse)           |
| <b>PCR</b>     |                                                |
| LDHA-220 5'UTR | 5'-CCTGTCATTAGGCCTTTCAACT-3'(forward)          |
|                | 5'-TGCCATATTGGACTTGGAACC-3'(reverse)           |
| LDHA-203 3'UTR | 5'-GGCTACAACAGGATTCTAGGTG-3'(forward)          |
|                | 5'-CACACGGTAAACATCCACCT-3'(reverse)            |
| LDHA-203 5'UTR | 5'-TGCCTTGGGCTTGAGCTTTG-3'(forward)            |
|                | 5'-GGTTCACCCATCGCGGTTTAT-3'(reverse)           |
| ACTB           | 5'-GATGCGTTGTTACAGGAAGTCC-3'(forward)          |
|                | 5'-GGCACGAAGGCTCATCATTCA-3'(reverse)           |
| <b>RACE</b>    |                                                |
| 3'GSP_F1       | 5'-CGTCAAGCCCAGCCCAATAGGAAGCACCTG-3' (forward) |
| 3'GSP_F2       | 5'-ACAGAATACTCCACACCTCGGGACTCCA-3' (forward)   |
| 3'GSP_F3       | 5'-TGGAGGAGAGTGCTGGTGAATGGCAGGTGT-3' (forward) |
| 3'GSP_F4       | 5'-AGGTGTGTGCCTCAGTGCCTTGCTGCCA-3' (forward)   |
| 5'GSP_R1       | 5'-GGTCCCTGCCTGGTGCTGGTTTGGGTTAGT-3'(reverse)  |
| 5'GSP_R2       | 5'-ACACCTGCCATTCACCAGCACTCTCCTCCA-3' (reverse) |
| 5'GSP_R3       | 5'-TGTAAGAGGGCAGGCAGAAAGGGAGGTGGG-3' (reverse) |
| 5'GSP_R4       | 5'-CCCTCCTGACCACTGGGATGGGACAAGACA-3' (reverse) |
| 5'GSP_R5       | 5'-GCCTGGACCTTGGGTCTGTCCTCACCTGCA-3'(reverse)  |
| 5'GSP_R6       | 5'-GGCTAACTCAGAGGTGCCCTGATGGAGGGG-3'(reverse)  |
| 5'GSP_R7       | 5'-GCGACTGCGACAGTGTCTCGGGCAGTTCAG-3'(reverse)  |

**Supplementary Table 6 | LNAs, siRNAs and shRNAs for cell transfection, related to methods.**

| <b>Name</b>  | <b>Sequence</b>       |
|--------------|-----------------------|
| <b>LNA</b>   |                       |
| Ctrl-LNA     | AACACGTCTATACGC       |
| LNA-1        | AGAAAGAGTGTGGATC      |
| LNA-2        | GACAAACGGCCAGTGG      |
| <b>siRNA</b> |                       |
| Ctrl siRNA   | GGGUUGUAGAGUGCAUAAATT |
| si-PTBP1-1   | GCACAGUGUUGAAGAUCAUTT |
| si-PTBP1-2   | CCCAAAGCCUCUUUAUUCUTT |
| si-ESR1-1    | GAGGGAGAAUGUUGAAACATT |
| si-ESR1-2    | GGCUAGAGAUCCUGAUGAUTT |
| <b>shRNA</b> |                       |
| sh-Ctrl      | TTCTCCGAACGTGTCACGT   |
| sh-DIO3OS    | CAGTGACTAACCCAAACCA   |



Uncropped Blots and Gels

Fig. 2a

DIO3OS

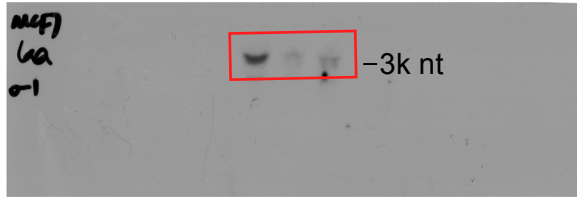

ACTB

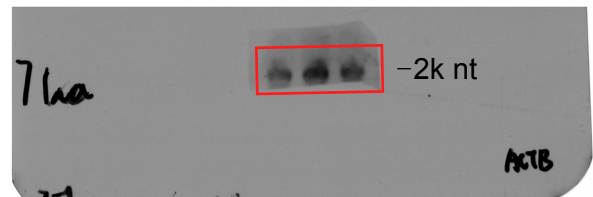

DIO3OS

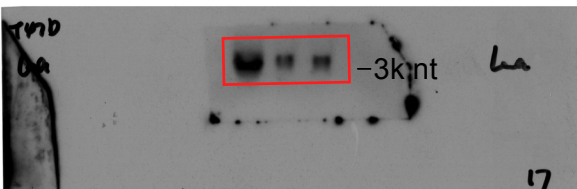

ACTB

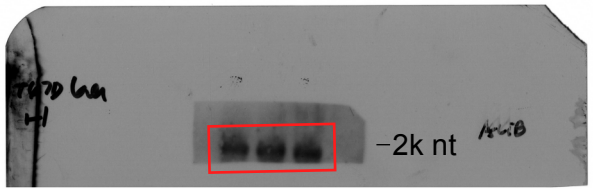

Fig. 2h

DIO3OS

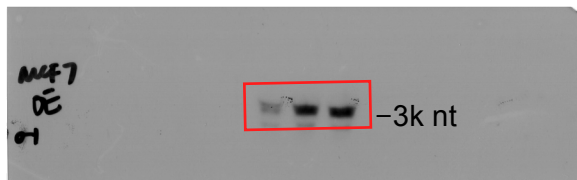

ACTB

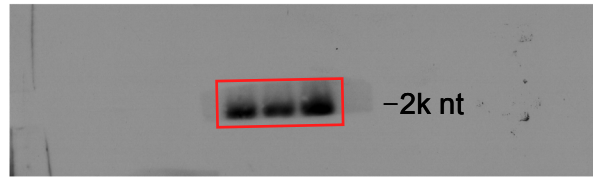

DIO3OS

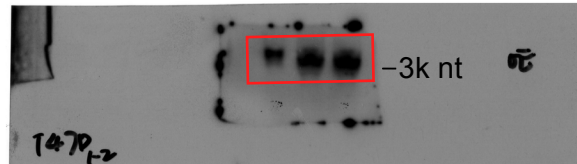

ACTB

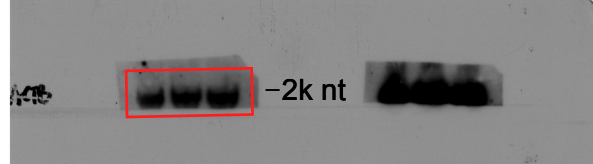

Fig. 3a

Pulldown

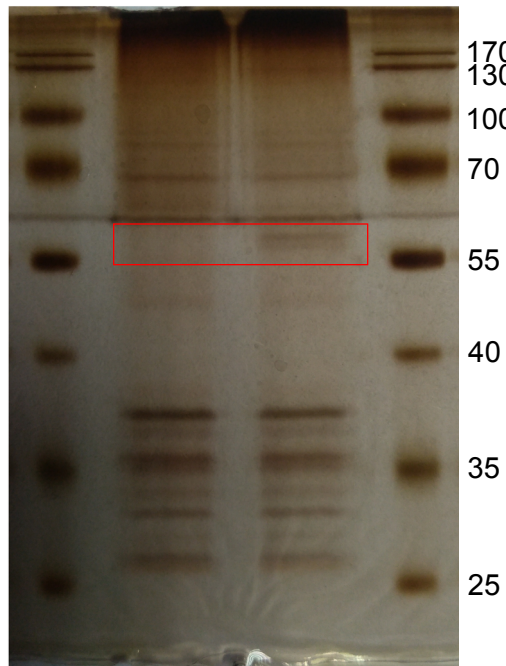

Fig. 3c

Pulldown:

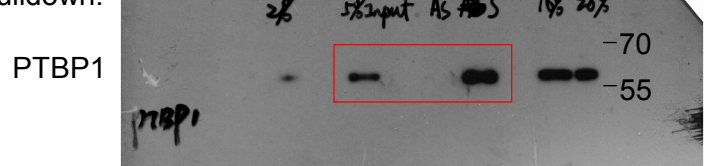

Fig. 3d

IP:  
PTBP1

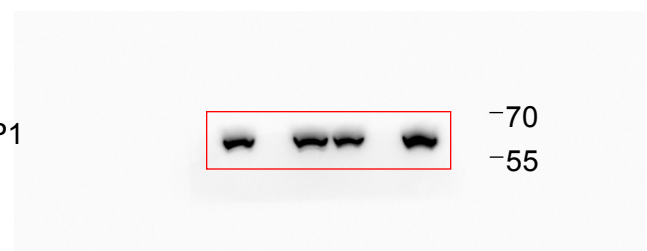

Fig. 3f

IB:  
FLAG

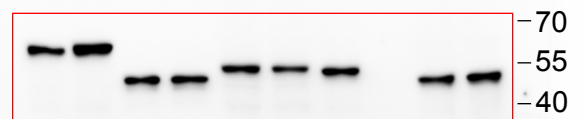

Fig. 5f

LDHA-203 3'UTR

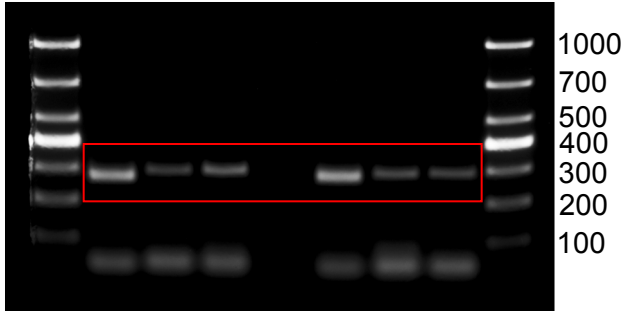

LDHA-203 5'UTR

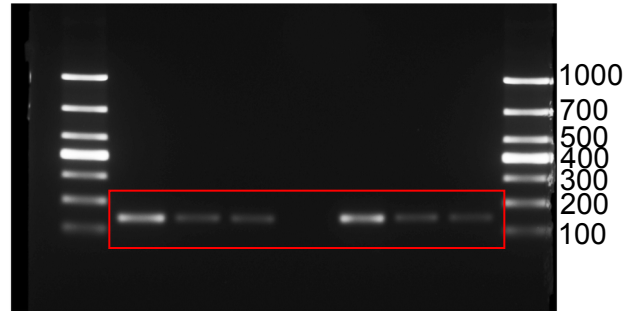

LDHA-220 5'UTR

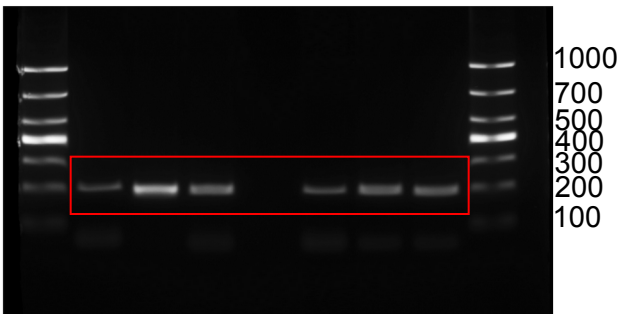

ACTB

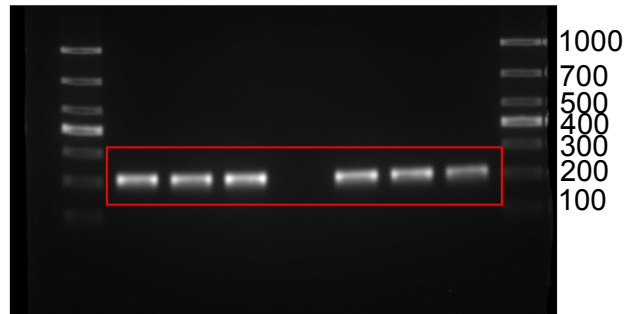

Fig. 5h

LDHA  -40  
-35

HSP90  -100  
-70

LDHA 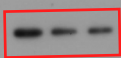 -40  
-35

HSP90  -100  
-70

Fig. 5i

Pulldown

PTBP1 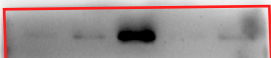 -70  
-55

Input: GAPDH  -40  
-35

Fig. 6a

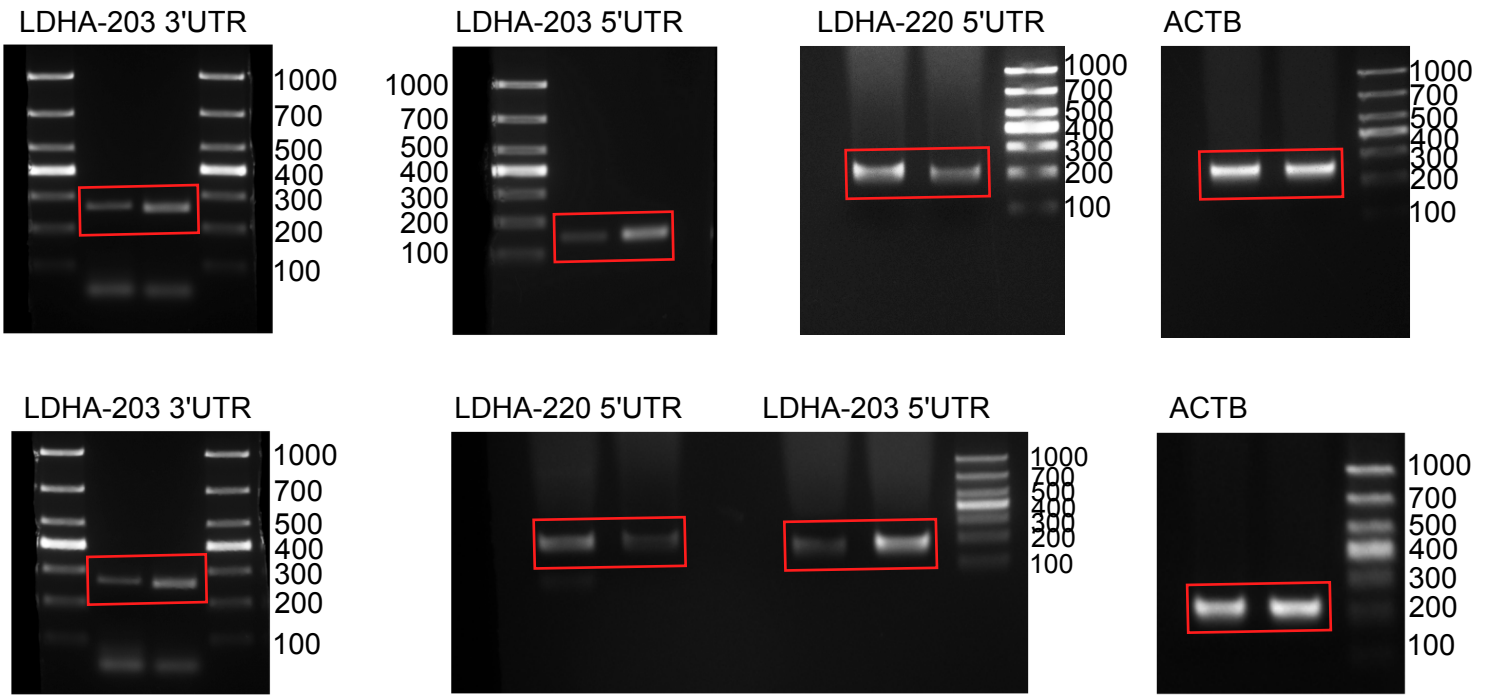

Fig. 6c

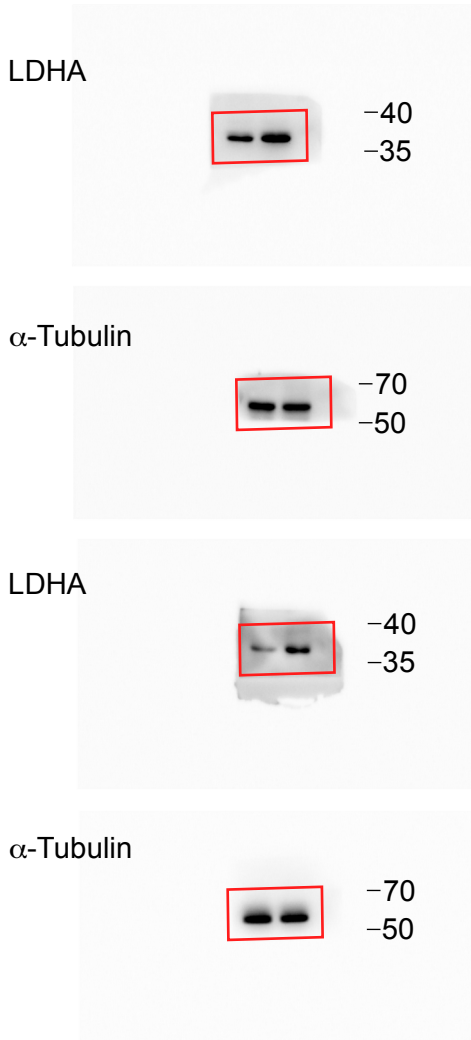

Fig. 6e

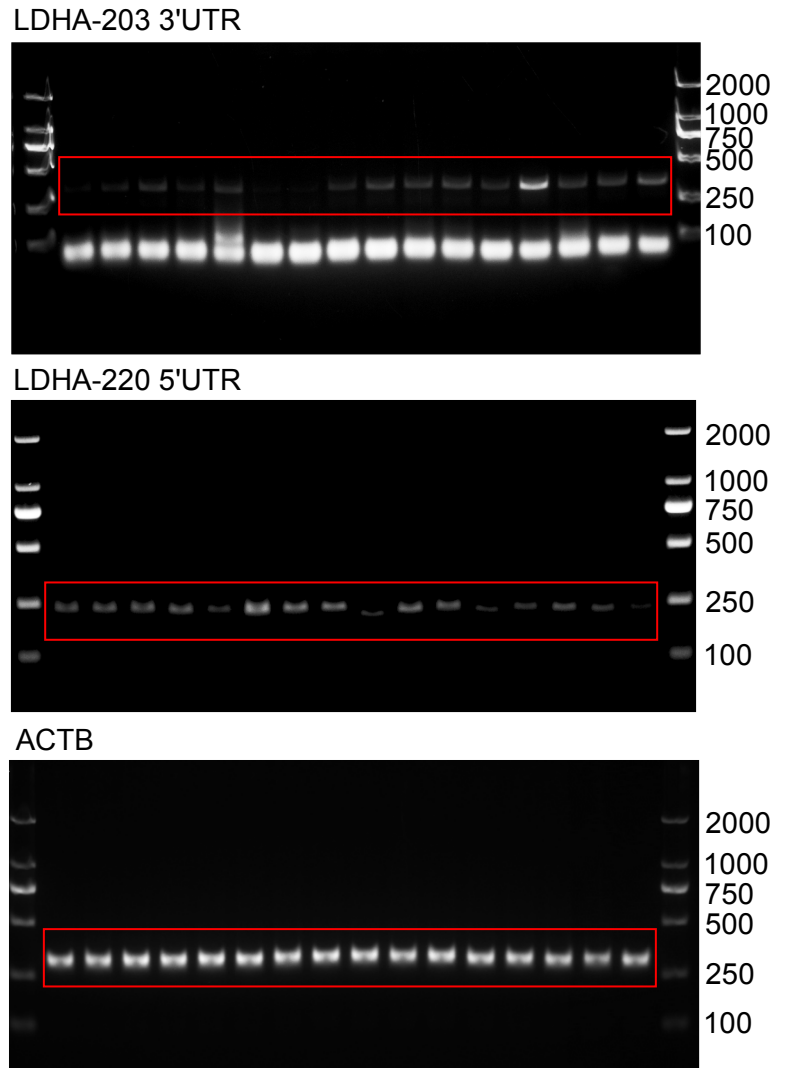

Supplementary Fig. 1j

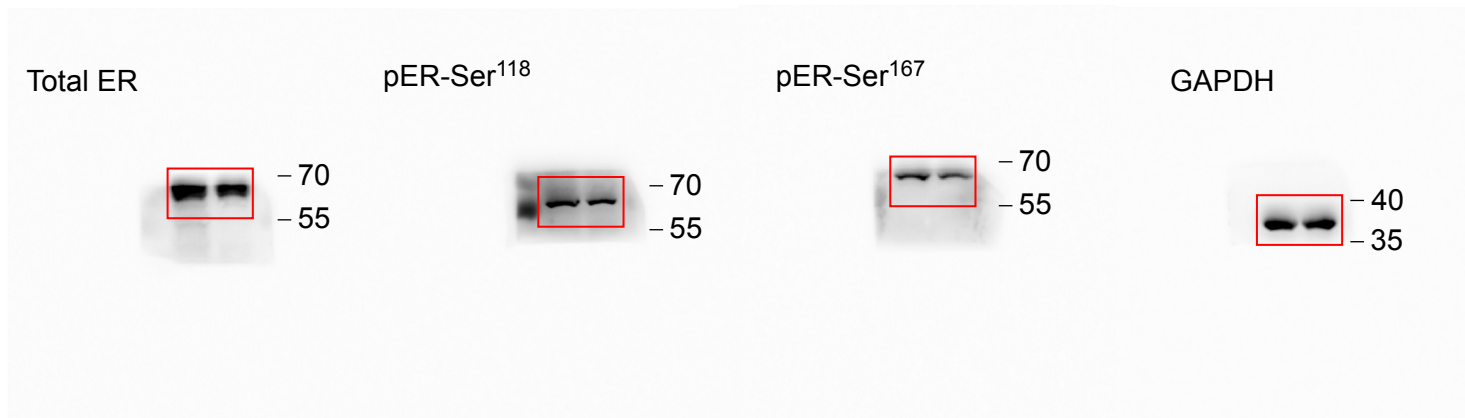

Supplementary Fig. 1m

Supplementary Fig. 2b

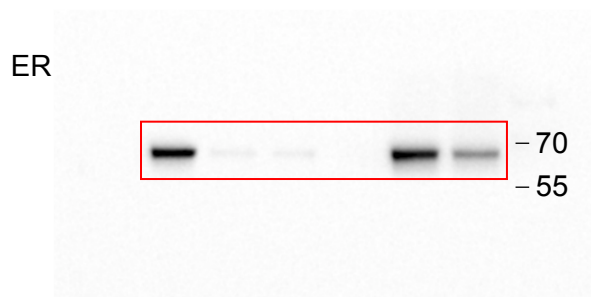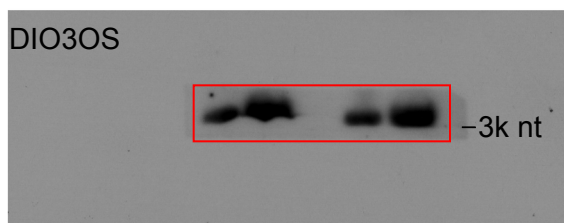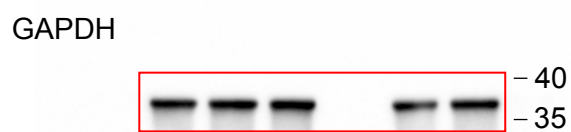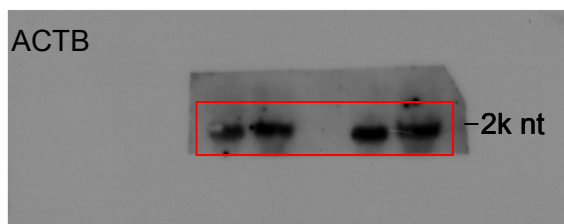

Supplementary Fig. 2c

Supplementary Fig. 2e

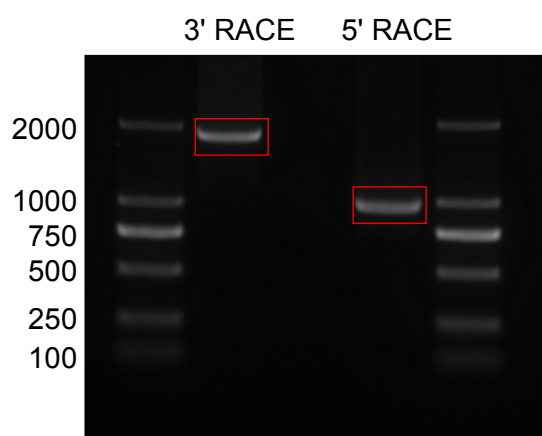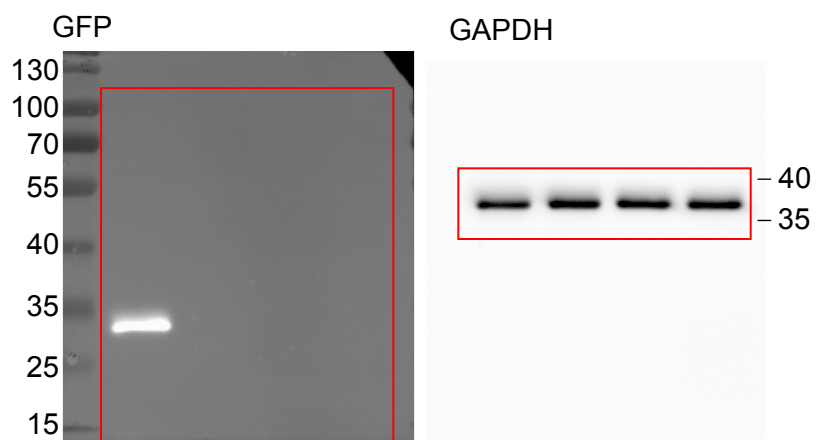



Supplementary Fig. 4a

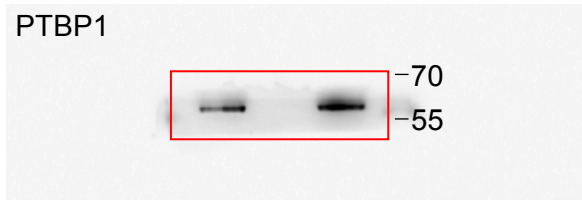

Supplementary Fig. 4j

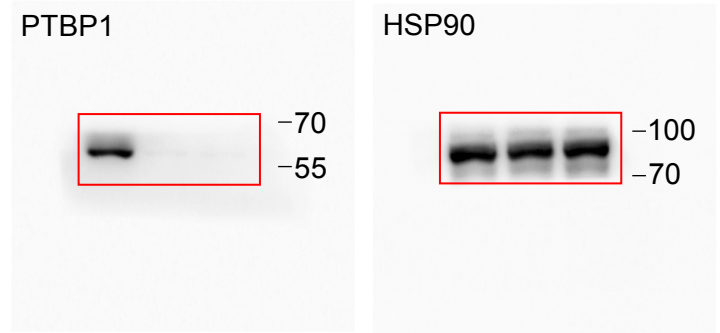

Supplementary Fig. 4i

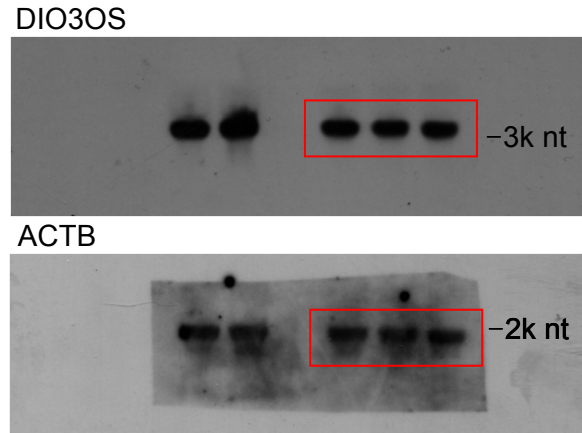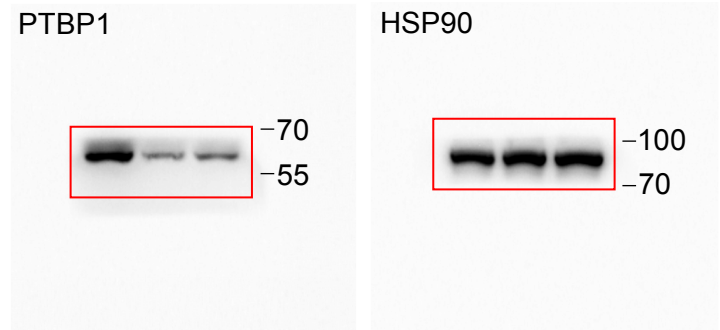

Supplementary Fig. 6f

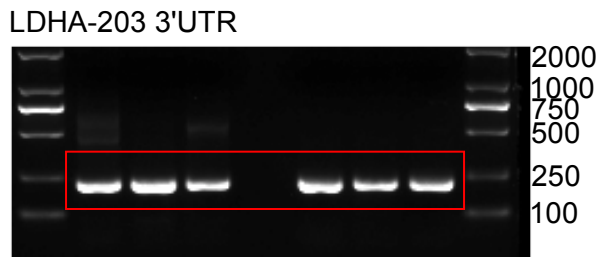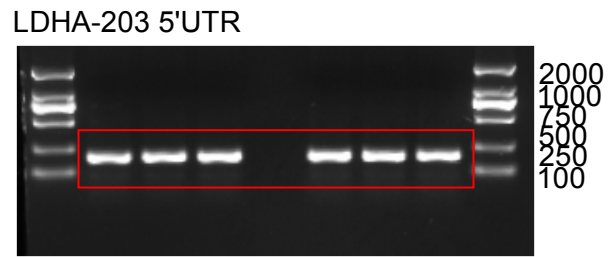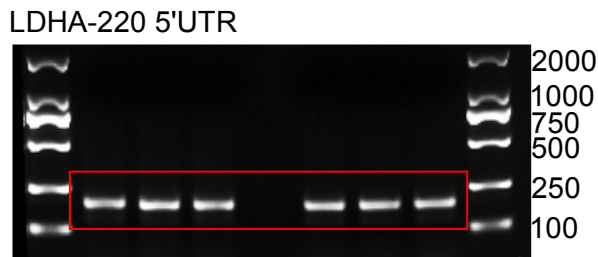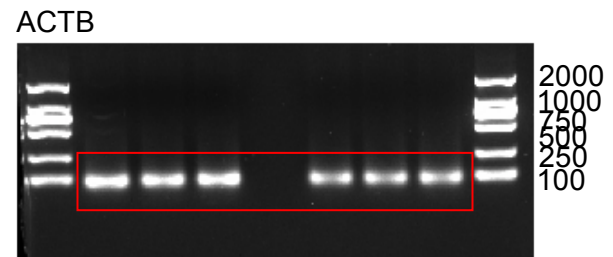

Supplementary Fig. 6h

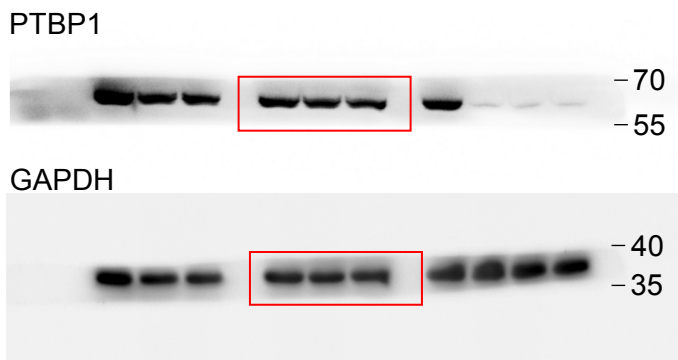

Supplementary Fig. 6j

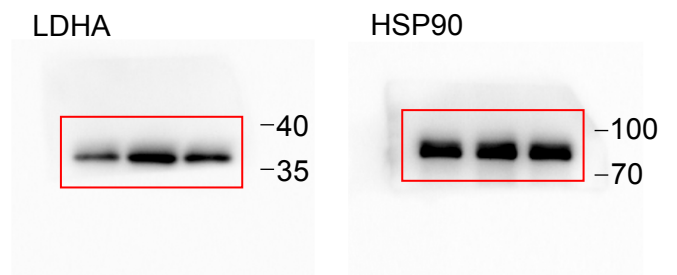

**Supplementary Note 1 | Peptides (red) match to homo sapiens PTBP1 translation (531 aa):**

MDGIVPDIAVGTKRGSDELFCVTNGPFIMSSNSASAANGNDSK**KFKGDSR**  
SAGVPSR**VIHIRKLPIDVTEGEVISLGLPFGKVTNLLMLK**GKNQAFIEMNTEE  
AANTMVNYYTSTVTPVLR**GQPIYIQFSNHKELKTDSSPNQARAQAALQAVNS**  
VQSGNLALAASAAAVDAGMAMAGQSPVLR IIVENLFYPVTL DVLHQIFSKF  
GTVLK**IITFTKNNQFQALLQYADPVSAQHAKLSLDGQNIYNACCTLRIDFSK**  
**LTSLNVKYNNDK**SRDYTRPDLPSGDSQPSLDQTMAAAFGLSVPNVHGALAP  
LAIPSAAAAAAAAAAGRIAIPGLAGAGNSVLLVSNLNPERVTPQSLFILFGVYGD  
**VQRVKILFNKK**ENALVQMADGNQAQLAMSHLNGHKLHGKPIRITLSKHQN  
**VQLPREGQEDQGLTKDYGNSPLHR**FKKPGSK**NFQNIFFPSATLHLSNIPPSVS**  
**EEDLKVLFSSNGGVVKGFKFFQKDRK**MALIQMGSVEEAVQALIDLHNHDLG  
ENHHLRVSFSKSTI
