# Supplementary material for: Long noncoding RNA DIO3OS induces glycolytic-dominant metabolic reprogramming to promote aromatase inhibitor resistance in breast cancer
Source: PubMed Central journal article supplement (PMC9684133; doi:10.1038/s41467-022-34702-x), 2022-11-22
Supplement: 41467_2022_34702_MOESM2_ESM.pdf [file 41467_2022_34702_MOESM2_ESM.pdf]

## **Description of Additional Supplementary Files**

**File Name:** Supplementary Data 1

**Description:** Mass spectrometry data for all proteins pulled by DIO3OS

**File Name:** Supplementary Data 2

**Description:** Analysis of alternative splicing events identified from RNA-seq data
